# Supplementary material for: Comparison of Fungal Thermophilic and Mesophilic Catalase–Peroxidases for Their Antioxidative Properties
Source: MDPI journal article supplement (doi:10.3390/antiox12071382), 2023-07-04
Supplement: s1 [file s1]

**Supplementary Table S1. Primers.**

| Gene                                      | Primer description | Sequence in 5'→ 3' direction    | T <sub>m</sub><br>[°C] |
|-------------------------------------------|--------------------|---------------------------------|------------------------|
| <i>CthedisKatG1</i><br><i>mutagenesis</i> | W90F_V_FWD         | TTTATTCGTATGGCAKTCCATAGCGCAGGCA | 73                     |
|                                           | W90F_V_REV         | TGCCTGCGCTATGGAMTGCCATACGAATAAA | 73                     |
| <i>CthedisKatG1</i><br><i>sequencing</i>  | CtG.M2-Fwd         | GCATTCAAAAGTCTGGATTATGAAGC      | 64                     |
|                                           | CtG.M2-Rev         | CTTCCGGATTAACATAGATCAGACC       | 64                     |
|                                           | CtG.M1-Fwd         | GCGAAATTAATACGACTCACTATAGG      | 62                     |
|                                           | CtG.M1-Rev         | CCAAGGGGTATGCTAGTTATTGC         | 66                     |
