# Supplementary material for: Comparison of Fungal Thermophilic and Mesophilic Catalase–Peroxidases for Their Antioxidative Properties
Source: MDPI journal article supplement (doi:10.3390/antiox12071382), 2023-07-04
Supplement: s1 [file s1]

Proteins were purified by FPLC using Superdex200 10/300 GL column. Fractions from chromatography were pooled together based on chromatograph from FPLC.

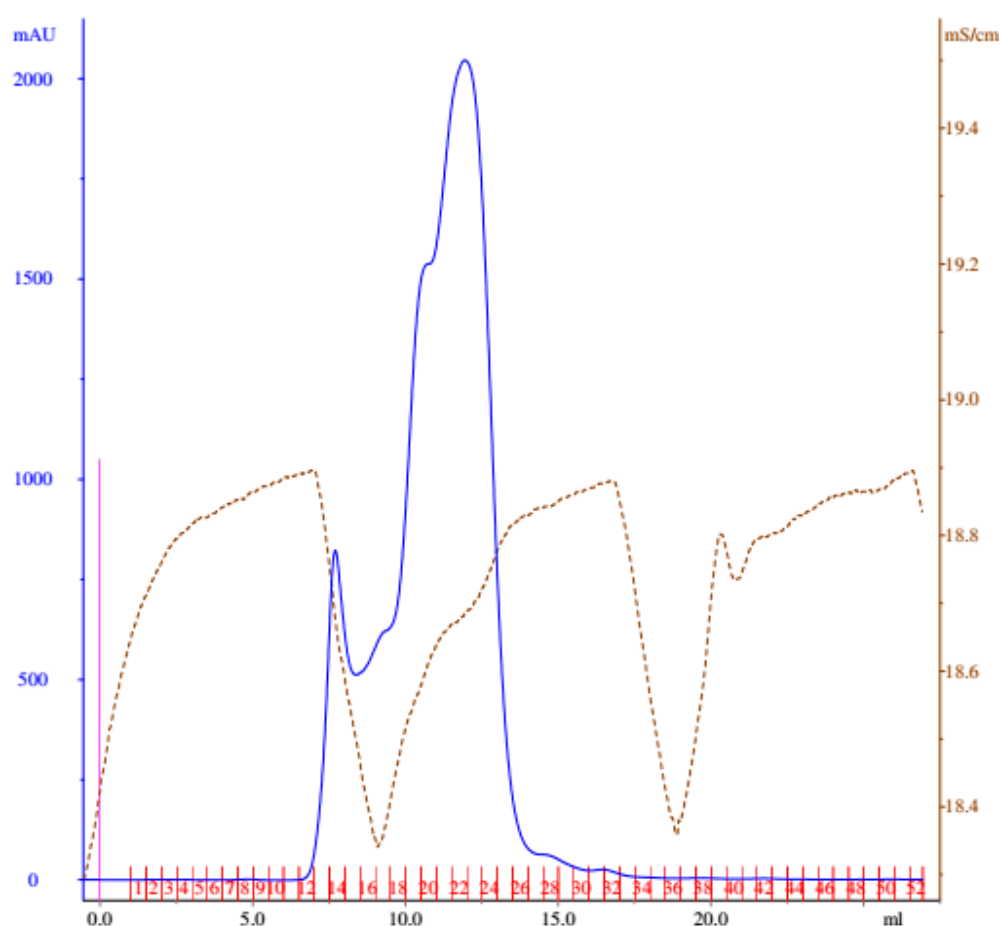

**Figure S1.** Chromatograph showing purification results of CthediskatG. UV captured at 280nm.

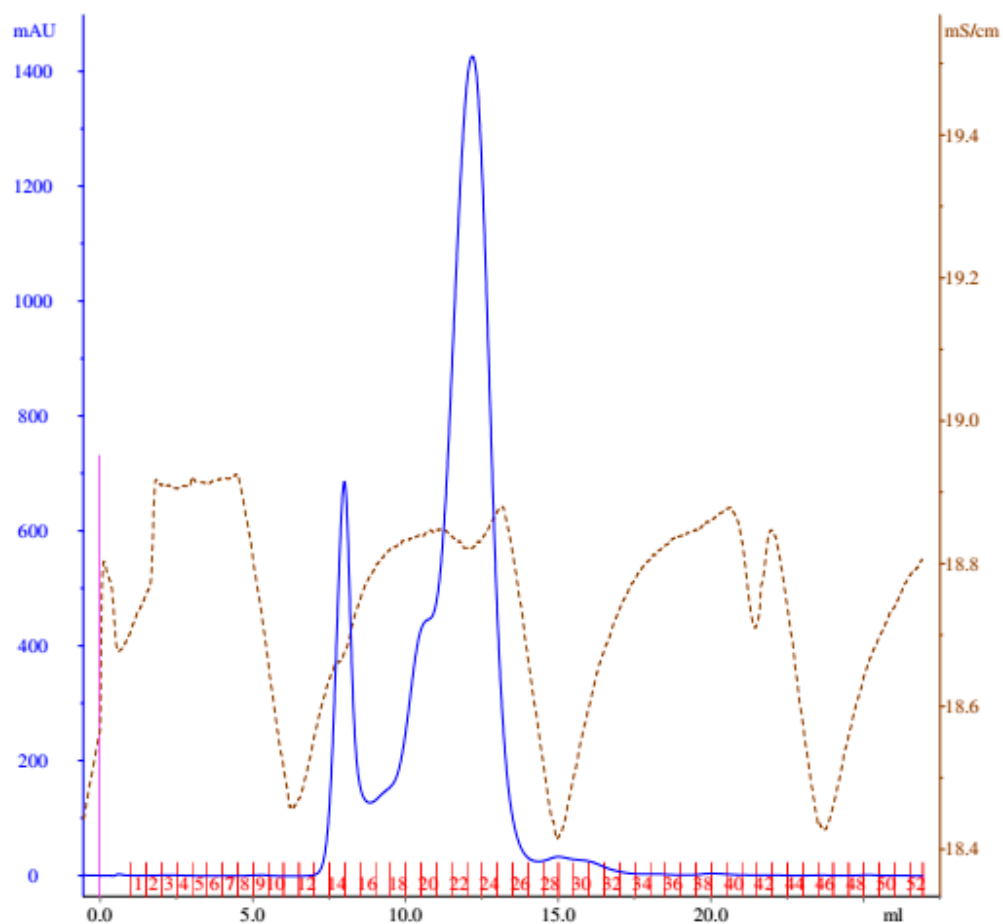

**Figure S2.** Chromatogram showing purification results of MagkatG1. UV captured at 280nm.

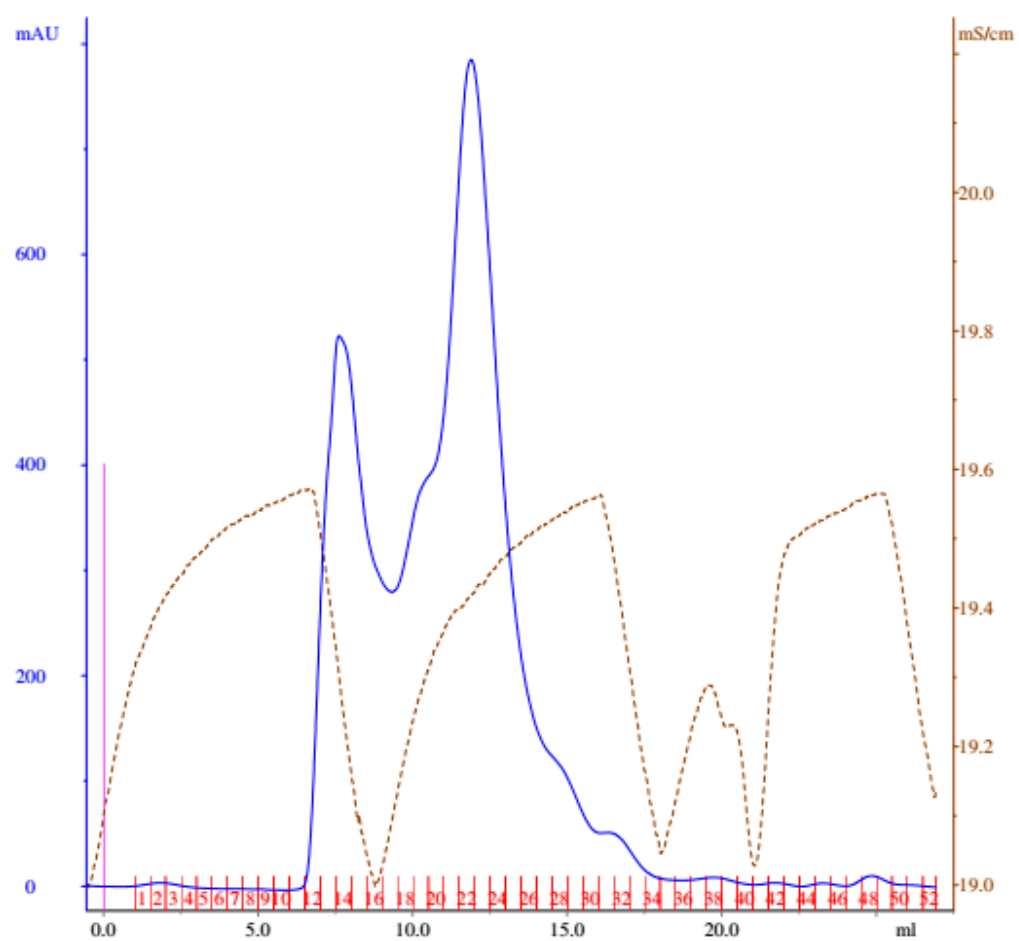

**Figure S3.** Chromatograph showing purification results of CthediskatG W90V. UV captured at 280nm.

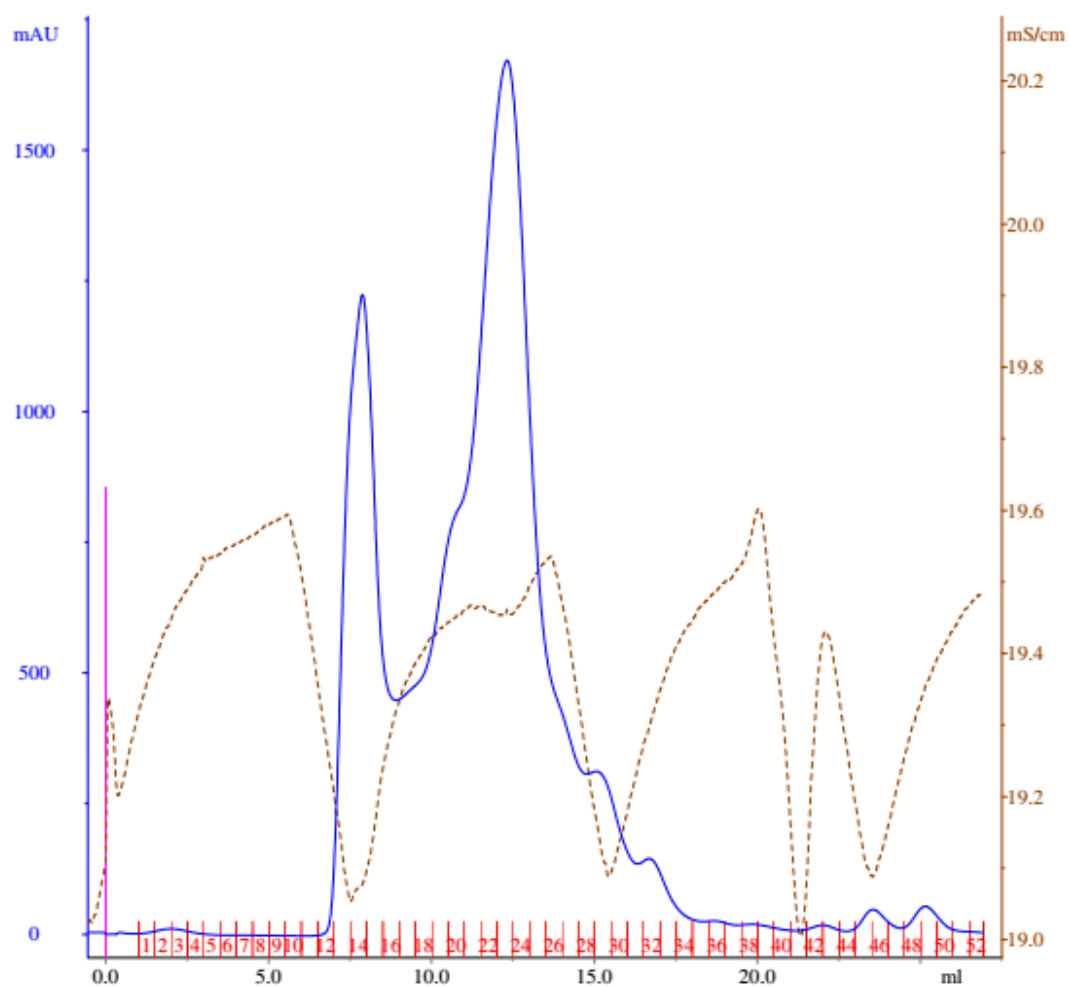

**Figure S4.** Chromatograph showing purification results of CthediskatG W90F UV captured at 280nm.
