# Supplementary material for: Comparison of Fungal Thermophilic and Mesophilic Catalase–Peroxidases for Their Antioxidative Properties
Source: MDPI journal article supplement (doi:10.3390/antiox12071382), 2023-07-04
Supplement: s1 [file s1]

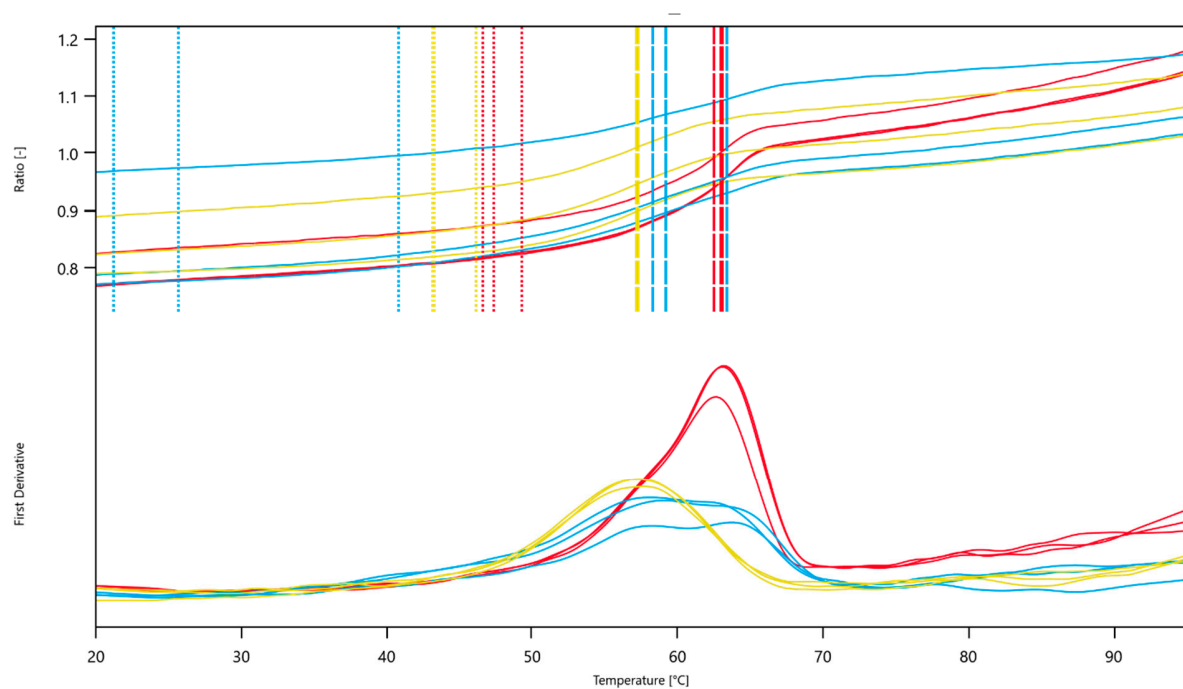

**Figure S5.** NanoDSF spectra thermal denaturation of the CthedisKatG and mutants. CthedisKatG wt is shown in red, CthedisKatG W90F in blue and CthedisKatG W90V in yellow.
