# Supplementary material for: Comparison of Fungal Thermophilic and Mesophilic Catalase–Peroxidases for Their Antioxidative Properties
Source: Antioxidants (Basel). 2023 Jul 4;12(7):1382. doi: 10.3390/antiox12071382 (PMC10376177; doi:10.3390/antiox12071382)
Supplement: Supplementary file 1 [file antioxidants-12-01382-s001.zip]

Archive with 4 entries (4 files):
- Suplement S1 -  CthedisKatG and MagKatG1 FPLC.pdf
- Suplement S2 -  NanoDSF spectra of CthedisKatG and mutants.pdf
- Supplementary Table S1 - Primers.pdf
- Supplementary Table S2 - KatG  Xlinked peptides Mw_XIC.xlsx
