# Supplementary material for: Comparison of Fungal Thermophilic and Mesophilic Catalase–Peroxidases for Their Antioxidative Properties
Source: Antioxidants (Basel). 2023 Jul 4;12(7):1382. doi: 10.3390/antiox12071382 (PMC10376177; doi:10.3390/antiox12071382)
Supplement: Supplementary file 1 [file antioxidants-12-01382-s001.zip › Supplementary Table S2 - KatG Xlinked peptides Mw_XIC.xlsx]

## Sheet: MagKatG1
Peptide No.	Monoisotopic Mw [Da]	Sequence
1	1178.53	MAWHSAGTYR
2	3298.67	DLEKPVSAAHMGLIYVNPEGPDGIPDPVAAAR
3	2042.98	MAMNDEETVALIAGGHTVGK
Peptides 1-2-3	6520.17
Peptides 1-2	4477.19
Peptides 2-3	5341.64
Peptides 1-2-3
Theoretical Mw [Da]	Charge	Theoretical m/z		Experimental m/z	Experimental Mw [Da]	Average Experimental [Da]	Difference Theoretical-Experimental [Da]
6520.17	1	6521.18		ND
6520.17	2	3261.09		ND
6520.17	3	2174.4		ND
6520.17	4	1631.05		1630.05	6516.16
6520.17	5	1305.04		1304.24	6516.15
6520.17	6	1087.7		1087.03	6516.15
6520.17	7	932.46		931.886	6516.15
6520.17	8	816.029		815.526	6516.15
6520.17	9	725.471		725.024	6516.15	6516.15	4.02148
Peptides 1-2
Theoretical Mw [Da]	Charge	Theoretical m/z		Experimental m/z	Experimental Mw [Da]	Average Experimental [Da]	Difference Theoretical-Experimental [Da]
4477.19	1	4478.19		ND
4477.19	2	2239.6		ND
4477.19	3	1493.4		ND
4477.19	4	1120.3		1119.8	4475.18
4477.19	5	896.439		896.044	4475.18
4477.19	6	747.199		746.872	4475.19
4477.19	7	640.599		ND
4477.19	8	560.649		ND		4475.18	2.0111
Peptides 2-3
Theoretical Mw [Da]	Charge	Theoretical m/z		Experimental m/z
5341.64	1	5342.64		ND
5341.64	2	2671.82		ND
5341.64	3	1781.55		ND
5341.64	4	1336.41		ND
5341.64	5	1069.33		ND
5341.64	6	891.274		ND
5341.64	7	764.092		ND
5341.64	8	668.705		ND

## Sheet: CthedisKatG
Peptide No.	Monoisotopic Mw [Da]	Sequence
1	1178.53	MAWHSAGTYR
2	3283.65	ELETPLAAAHMGLIYVNPEGPDGIPDPVAAAR
3	2090.98	MAMNDEETVALIAGGHTFGK
Peptides 1-2-3	6553.16
Peptides 1-2	4462.18
Peptides 2-3	5374.63
Peptides 1-2-3
Theoretical Mw [Da]	Charge	Theoretical m/z		Experimental m/z	Experimental Mw [Da]	Average Experimental [Da]	Difference Theoretical-Experimental [Da]
6553.16	1	6554.17		ND
6553.16	2	3277.59		ND
6553.16	3	2185.39		ND
6553.16	4	1639.3		1638.3	6549.18
6553.16	5	1311.64		1310.84	6549.15
6553.16	6	1093.2		1092.53	6549.14
6553.16	7	937.173		936.6	6549.15
6553.16	8	820.152		819.651	6549.15
6553.16	9	729.136		728.69	6549.14	6549.15	4.00918
Peptides 1-2
Theoretical Mw [Da]	Charge	Theoretical m/z		Experimental m/z
4462.18	1	4463.19		ND
4462.18	2	2232.1		ND
4462.18	3	1488.4		ND
4462.18	4	1116.55		ND
4462.18	5	893.444		ND
4462.18	6	744.705		ND
4462.18	7	638.462		ND
4462.18	8	558.78		ND
Peptides 2-3
Theoretical Mw	Charge	Theoretical m/z		Experimental m/z
5374.63	1	5375.64		ND
5374.63	2	2688.32		ND
5374.63	3	1792.55		ND
5374.63	4	1344.67		ND
5374.63	5	1075.93		ND
5374.63	6	896.779		ND
5374.63	7	768.812		ND
5374.63	8	672.836		ND
